# Supplementary material for: Temporal Regulation of Foregut Development by HTZ-1/H2A.Z and PHA-4/FoxA
Source: PubMed Central journal article supplement (PMC1584275; doi:10.1371/journal.pgen.0020161), 2006-09-29

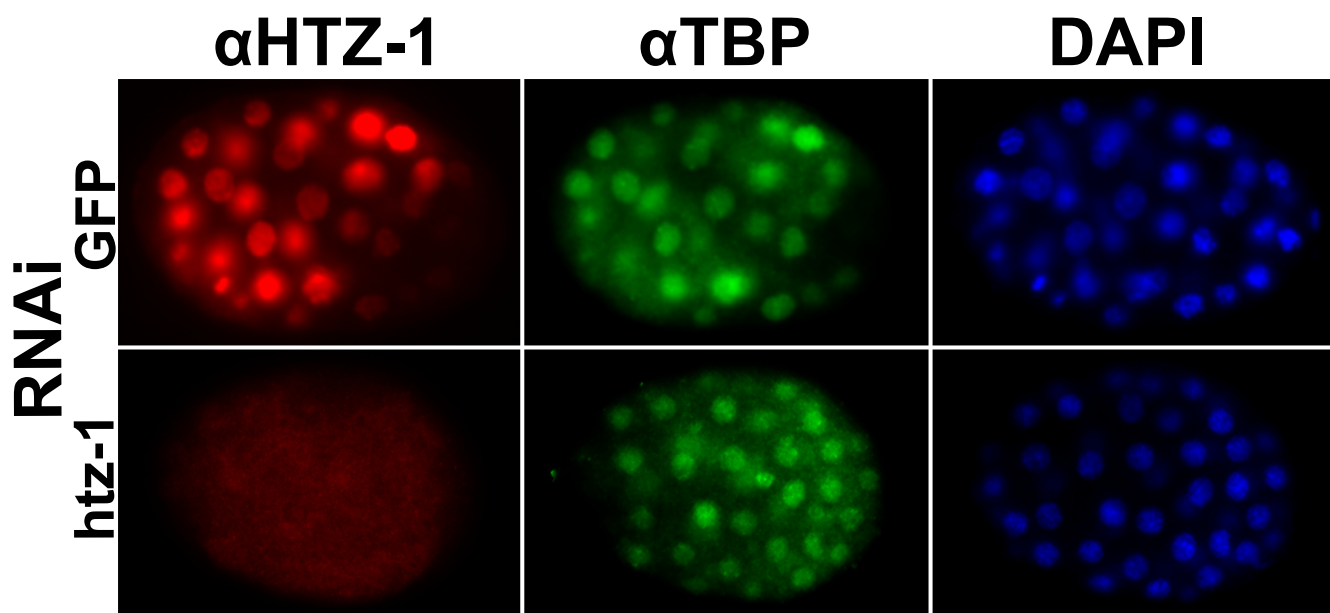

Supplement: pgen.0020161.sg001.pdf [file pgen.0020161.sg001.pdf]
