# Supplementary material for: Temporal Regulation of Foregut Development by HTZ-1/H2A.Z and PHA-4/FoxA
Source: PubMed Central journal article supplement (PMC1584275; doi:10.1371/journal.pgen.0020161), 2006-09-29

**A**

**htz-1 RNAi**

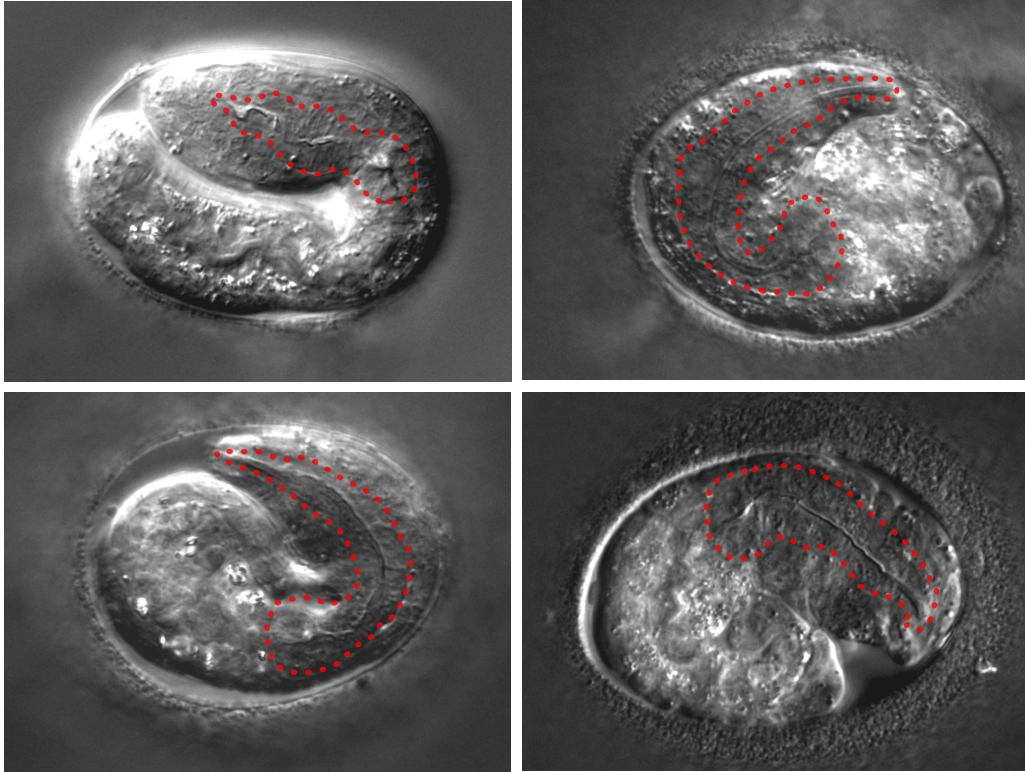

**B**

**ssl-1 RNAi**

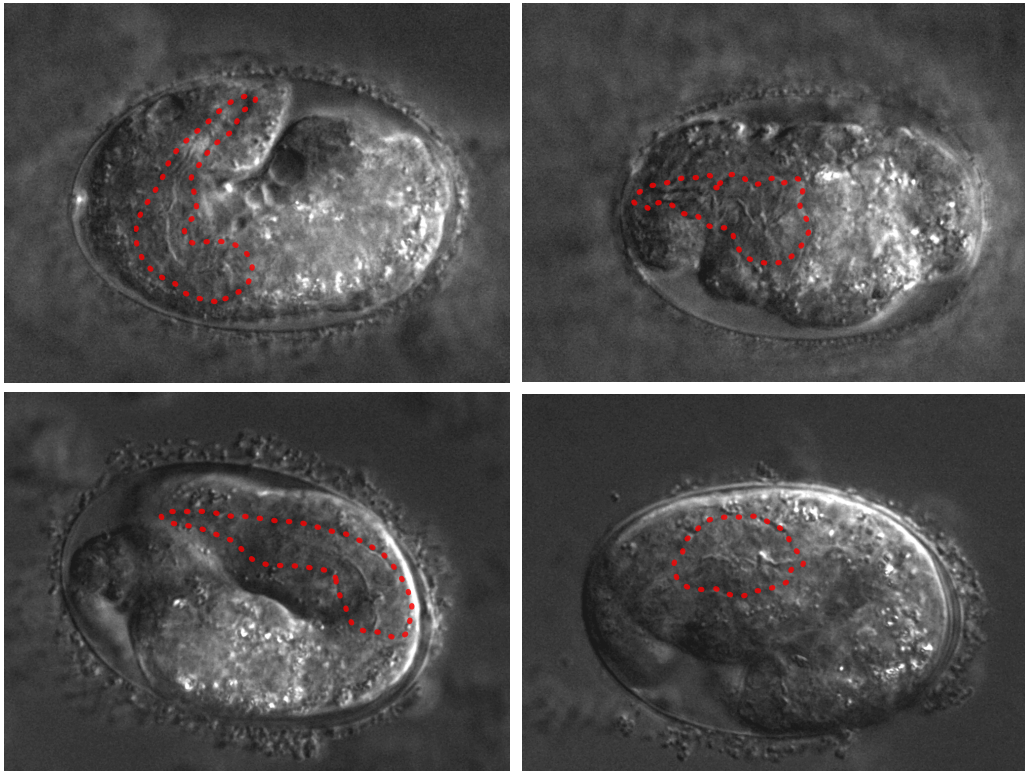

Supplement: pgen.0020161.sg004.pdf [file pgen.0020161.sg004.pdf]
